# Supplementary material for: Species Differences in Metabolism of Soluble Epoxide Hydrolase Inhibitor, EC1728, Highlight the Importance of Clinically Relevant Screening Mechanisms in Drug Development
Source: MDPI journal article supplement (doi:10.3390/molecules26165034), 2021-08-19
Supplement: s1 [file s1]

## **Species differences in metabolism of soluble epoxide hydrolase inhibitor, EC1728, highlight the importance of clinically relevant screening mechanisms in drug development.**

**Cindy McReynolds<sup>1,2</sup>, Jung Yang<sup>1,2</sup>, Alonso Guedes<sup>3</sup>, Christophe Morisseau<sup>1</sup>, Roberto Garcia<sup>4</sup>, Heather Knych<sup>5,6</sup>, Caitlin Tearney<sup>3</sup>, Briana Hamamoto<sup>5</sup>, Sung Hee Hwang<sup>1,2</sup>, Karen Wagner<sup>1,2</sup>, Bruce Hammock<sup>1,2\*</sup>**

<sup>1</sup>Department of Entomology and Nematology, UC Davis Comprehensive Cancer Center, University of California, Davis, Davis, CA, United States,

<sup>2</sup>EicOsis, Davis, CA, United States

<sup>3</sup>Department of Veterinary Clinical Sciences, College of Veterinary Medicine, University of Minnesota, St. Paul, MN 55108, USA.

<sup>4</sup>Dechra Development LLC, 1 Monument Sq, Portland, ME 04101.

<sup>5</sup>K.L. Maddy Equine Analytical Pharmacology Laboratory, School of Veterinary Medicine, University of California, Davis, USA.

<sup>6</sup>Department of Veterinary Molecular Biosciences, School of Veterinary Medicine, University of California, Davis, USA.

\*Correspondence: bdhammock@ucdavis.edu; Tel.: (530) 752-8465

Supplementary data includes calculated PK values (C<sub>max</sub>, T<sub>max</sub>, T<sub>1/2</sub>, AUC<sub>tot</sub>, L<sub>z</sub>, T<sub>1/2</sub>, MRT, Clearance and V<sub>ss</sub>) for each animal, relationship and projections between clearance, volume of distribution, and T<sub>1/2</sub> vs. body weight.

Supplementary Table S1. Individual PK parameters

## Mouse

| IV     | Dose  | Cmax  | Tmax | TLast | AUCtot  | Kel  | T <sub>1/2</sub> | MRT   | Clearance | Vss  |
|--------|-------|-------|------|-------|---------|------|------------------|-------|-----------|------|
| Unit   | mg/kg | ng/mL | h    | h     | ng/mL*h | 1/h  | h                | h     | mL/min/kg | L/kg |
| Animal |       |       |      |       |         |      |                  |       |           |      |
| 1.00   | 1     | 3401  | 0.50 | 48    | 8615    | 0.35 | 1.96             | 7.02  | 1.93      | 0.81 |
| 2.00   | 1     | 3988  | 0.25 | 96    | 10305   | 0.26 | 2.70             | 12.65 | 1.62      | 1.23 |
| 3.00   | 1     | 3456  | 0.25 | 48    | 7598    | 0.17 | 4.05             | 9.57  | 2.19      | 1.26 |
| 4.00   | 1     | 1503  | 0.50 | 72    | 7433    | 0.24 | 2.93             | 21.01 | 2.24      | 2.83 |

| PO     | Dose  | Cmax  | Tmax | TLast | AUCtot  | Kel  | T <sub>1/2</sub> | MRT   | F  |
|--------|-------|-------|------|-------|---------|------|------------------|-------|----|
| Unit   | mg/kg | ng/mL | h    | h     | ng/mL*h | 1/h  | h                | h     | %  |
| Animal |       |       |      |       |         |      |                  |       |    |
| 1.00   | 10    | 1802  | 4.00 | 96    | 36251   | 0.04 | 15.78            | 22.38 | 42 |
| 2.00   | 10    | 3431  | 4.00 | 96    | 24129   | 0.05 | 13.42            | 20.55 | 23 |
| 3.00   | 10    | 2594  | 4.00 | 96    | 30596   | 0.03 | 20.17            | 26.39 | 40 |
| 4.00   | 10    | 2453  | 4.00 | 96    | 23523   | 0.04 | 15.87            | 16.65 | 32 |

## Cat

| IV                  | Dose  | Cmax   | Tmax  | TLast | AUCtot  | Kel  | T <sub>1/2</sub><br>alpha | T <sub>1/2</sub><br>beta | MRT  | Clearance | Vss  |
|---------------------|-------|--------|-------|-------|---------|------|---------------------------|--------------------------|------|-----------|------|
| Unit                | mg/kg | ng/mL  | h     | h     | ng/mL*h | 1/h  | h                         | h                        | h    | mL/min/kg | L/kg |
| JAJ31 <sup>nm</sup> | 0.1   | 708    | 0.080 | 3     | 192.53  | 0.59 | 1.18                      | n.d.                     | 1.05 | 8.66      | 0.55 |
| JEC2 <sup>nm</sup>  | 0.1   | 2910   | 0.017 | 8     | 366.11  | 0.38 | 1.82                      | n.d.                     | 1.41 | 4.55      | 0.38 |
| LAU4 <sup>nm</sup>  | 0.1   | 2610   | 0.017 | 3     | 256.02  | 0.57 | 1.22                      | n.d.                     | 0.66 | 6.51      | 0.26 |
| 1 <sup>f</sup>      | 1.0   | 37,267 | 0.025 | 96    | 10131.1 | 0.02 | 0.21                      | 21.22                    | 11.2 | 1.65      | 1.77 |
| 2 <sup>f</sup>      | 1.0   | 29,028 | 0.025 | 96    | 13344.8 | 0.03 | 0.35                      | 19.62                    | 12.8 | 1.25      | 1.20 |
| 3 <sup>f</sup>      | 1.0   | 31,399 | 0.025 | 96    | 6820.16 | 0.04 | 0.12                      | 12.69                    | 9.0  | 2.44      | 1.61 |
| 4 <sup>f</sup>      | 1.0   | 29,751 | 0.025 | 96    | 7355.12 | 0.03 | 0.44                      | 34.10                    | 8.0  | 2.27      | 1.69 |
| 5 <sup>f</sup>      | 1.0   | 21,948 | 0.025 | 96    | 6817.12 | 0.03 | 0.12                      | 15.32                    | 11.3 | 2.44      | 1.93 |
| 6 <sup>f</sup>      | 1.0   | 14,055 | 0.025 | 96    | 4622.26 | 0.03 | 0.13                      | 19.85                    | 12.6 | 3.61      | 3.60 |

| PO                 | Dose  | Cmax  | Tmax | TLast | AUCtot  | Kel  | T <sub>1/2</sub> | MRT   | F   |
|--------------------|-------|-------|------|-------|---------|------|------------------|-------|-----|
| Unit               | mg/kg | ng/mL | h    | h     | ng/mL*h | 1/h  | h                | h     | %   |
| EAB2 <sup>nm</sup> | 0.1   | 80.3  | 0.5  | 2.5   | 69.26   | 0.92 | 0.67             | 1.19  | 8%  |
| EAQ4 <sup>f</sup>  | 0.1   | 86.2  | 1.5  | 4     | 168.00  | 0.75 | 0.92             | 1.849 | 21% |
| LBB3 <sup>nm</sup> | 0.1   | 108   | 0.5  | 4     | 183.27  | 0.25 | 1.07             | 1.859 | 22% |
| CBD2 <sup>f</sup>  | 3     | 642   | 1.0  | 12    | 1944.23 | 0.32 | 2.16             | 3.41  | 8%  |
| LBA3 <sup>nm</sup> | 3     | 1080  | 0.5  | 12    | 2217.88 | 0.30 | 2.30             | 2.52  | 9%  |
| LBB2 <sup>nm</sup> | 3     | 686   | 2.0  | 12    | 2083.26 | 0.22 | 3.13             | 4.47  | 8%  |
| CBD3 <sup>f</sup>  | 10    | 1720  | 0.5  | 12    | 2535.76 | 0.28 | 2.48             | 2.48  | 3%  |
| JEH2 <sup>nm</sup> | 10    | 677   | 1    | 12    | 2048.27 | 0.29 | 6.91             | 5.12  | 3%  |
| LAQ1 <sup>nm</sup> | 10    | 948   | 1    | 12    | 2250.28 | 0.38 | 4.11             | 3.10  | 3%  |

n.d. = not determined; nm = neutered male; sf = spayed female; f = female; nm = neutered male

Dog

| IV   | Dose  | Cmax  | Tmax  | TLast | AUCtot  | T <sub>1/2</sub><br>alpha | T <sub>1/2</sub><br>beta | MRT   | Clearance | Vss  |
|------|-------|-------|-------|-------|---------|---------------------------|--------------------------|-------|-----------|------|
| Unit | mg/kg | ng/mL | h     | h     | ng/mL*h | h                         | h                        | h     | mL/min/kg | L/kg |
| 1    | 0.3   | 2358  | 0.025 | 96    | 15268   | 0.05                      | 55.13                    | 38.95 | 0.33      | 1.61 |
| 2    | 0.3   | 685   | 0.1   | 96    | 14183   | 0.25                      | 48.47                    | 35.10 | 0.35      | 1.27 |
| 3    | 0.3   | 1024  | 0.025 | 96    | 6337    | 0.07                      | 41.03                    | 36.56 | 0.79      | 3.06 |
| 4    | 0.3   | 617   | 0.025 | 96    | 3164    | 0.05                      | 33.55                    | 33.08 | 1.58      | 6.00 |
| 5    | 0.3   | 3145  | 0.025 | 96    | 24359   | 0.05                      | 58.04                    | 38.84 | 0.21      | 1.30 |

| PO | Dose | Cmax | Tmax  | TLast | AUCtot | Kel     | thalf | MRT    | F    |
|----|------|------|-------|-------|--------|---------|-------|--------|------|
|    | Unit | mg   | ng/mL | h     | h      | ng/mL*h | 1/h   | h      | %    |
| 1  | 0.3  | 197  | 12.00 | 96    | 11,825 | 0.02    | 33.05 | 54.69  | 34   |
| 2  | 0.3  | 387  | 24.00 | 96    | 12,969 | 0.02    | 31.74 | 46.69  | 40   |
| 3  | 0.3  | 157  | 12.00 | 96    | 8,877  | 0.01    | 49.82 | 70.51  | 61   |
| 4  | 0.3  | 621  | 3.00  | 96    | 21,212 | 0.03    | 21.97 | 29.80  | 294* |
| 5  | 0.3  | 656  | 0.38  | 96    | 17,330 | 0.01    | 72.89 | 101.87 | 31   |

\* Not included in %F average.

## Horse

| IV      | Dose  | Cmax  | Tmax | TLast | AUCtot  | Kel  | thalf | MRT   | Clearance | Vss  |
|---------|-------|-------|------|-------|---------|------|-------|-------|-----------|------|
| Unit    | mg/kg | ng/mL | h    | h     | ng/mL*h | 1/h  | h     | h     | mL/min/kg | L/kg |
| Animal  |       |       |      |       |         |      |       |       |           |      |
| Flora   | 1     | 2506  | 0.08 | 96    | 22249   | 0.04 | 16.10 | 22.34 | 0.75      | 1.00 |
| Kitty   | 1     | 2284  | 0.08 | 72    | 16242   | 0.06 | 11.02 | 18.02 | 1.03      | 1.11 |
| Rice    | 1     | 2151  | 0.08 | 96    | 17120   | 0.04 | 15.44 | 20.89 | 0.97      | 1.22 |
| Curtis  | 1     | 2182  | 0.08 | 96    | 19598   | 0.04 | 18.81 | 22.83 | 0.85      | 1.17 |
| George  | 1     | 2812  | 0.08 | 96    | 14188   | 0.04 | 17.77 | 15.92 | 1.17      | 1.12 |
| Que     | 1     | 2910  | 0.08 | 96    | 24562   | 0.04 | 18.81 | 22.66 | 0.68      | 0.92 |
| Robin   | 1     | 2304  | 0.08 | 96    | 14106   | 0.04 | 17.38 | 19.57 | 1.18      | 1.39 |
| Ketchup | 1     | 2406  | 0.08 | 72    | 10388   | 0.06 | 12.47 | 14.27 | 1.60      | 1.37 |

[illegible]

# Supplementary Figure S1

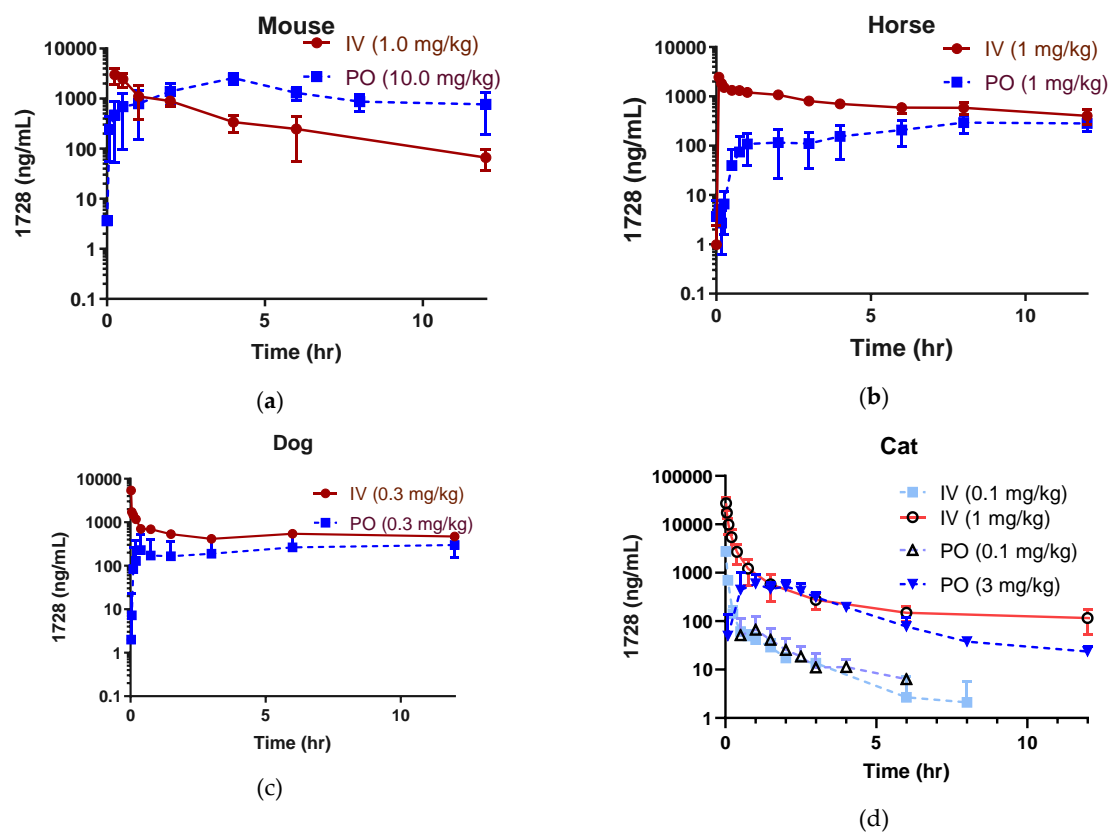

**Supplementary Figure 1.** Main figure 1 regraphed to emphasize the first 12 hours of distribution and elimination. General overview of PK profiles of EC1728 represented as semi log-linear concentrations after dosing IV or PO in mice (a), horses (b), dogs (c) and cats (d).  $T_{last}$  in cats at 0.1 mg/kg iv and PO was 8 hour for IV and 12 hour for PO; however, the  $C_{last}$  in the low dose cat group dosed IV was observed at 3 hour and 4 hour for PO.

Supplementary Table S2. Stability of EC1728 in liver s9 fractions isolated from different species

|                    | <b>S9+NADPH+Cofactors<br/>(Phase 2 metabolism)</b> | <b>S9+NADPH<br/>(Phase 1 metabolism)</b> | <b>S9<br/>(blank)</b> |
|--------------------|----------------------------------------------------|------------------------------------------|-----------------------|
| <b>Mouse</b>       | 25.08                                              | 24.56                                    | 25.95                 |
|                    | 25.86                                              | 24.52                                    | 25.45                 |
|                    | 24.83                                              | 24.93                                    |                       |
| <b>% remaining</b> | 98 ± 2%                                            | 95 ± 0.1                                 | 100 ± 1               |
| <b>Cat</b>         | 23.99                                              | 25.08                                    | 27.03                 |
|                    | 25.90                                              | 25.61                                    | 26.77                 |
|                    | 26.07                                              | 27.02                                    |                       |
| <b>% remaining</b> | 94 ± 5                                             | 94 ± 1                                   | 100 ± 0.1             |
| <b>Dog</b>         | 25.17                                              | 25.34                                    | 24.28                 |
|                    | 26.14                                              | 25.87                                    | 24.66                 |
|                    | 25.46                                              | 22.57                                    |                       |
| <b>% remaining</b> | 105 ± 2                                            | 107 ± 4                                  | 100 ± 1               |
| <b>Horse</b>       | 22.76                                              | 22.86                                    | 22.62                 |
|                    | 23.10                                              | 24.13                                    | 26.30                 |
|                    | 23.34                                              | 24.56                                    |                       |
| <b>% remaining</b> | 94 ± 1                                             | 95 ± 3                                   | 100 ± 11              |

Numbers represent the peak area of EC1728 divided by the internal standard (deuterated-EC1728). Negative control samples were included without microsomes (25.12, 24.165, 24.49, or 101% remaining). Percent remaining was calculated by dividing average values by average values of s9 sample without cofactors (NADPH, UDPGA, PAPS, GSH).

Supplementary Table S3. Calculated clearance and accuracy based on body weight

| Species for<br>calculation* | <b><u>Predicted Values</u></b> |      |      |
|-----------------------------|--------------------------------|------|------|
|                             | Cl(hep) (ml/min*kg)            |      |      |
|                             | MCDH                           | MCH  | MDH  |
| Mouse                       | 5.84                           | 7.69 | 4.78 |
| Cat                         | 2.07                           | 3.16 | 1.74 |
| Dog                         | 1.60                           | 2.53 | 1.35 |
| Horse                       | 0.71                           | 1.26 | 0.61 |
|                             | <b><u>Accuracy</u></b>         |      |      |
| Mouse                       | 125%                           | 95%  | 153% |
| Cat                         | 169%                           | 111% | 202% |
| Dog                         | 28%                            | 18%  | 33%  |
| Horse                       | 169%                           | 95%  | 197% |

\*M: Mouse, C: Cat, D: Dog, H: Horse

The number and date of receipt of the agreement from bioethical commission of each institution is listed below.

**Horses**

The project identification code: #20319

Date of approval: 11 November 2018

Ethics Committee: UC Davis Institutional Animal Care and Use committee

**Mice**

The project identification code: #19296

Date of approval: 3 May 2018, renewed annually.

Ethics Committee: UC Davis Institutional Animal Care and Use committee

**Cats:**

UC Davis

The project identification code: 17211

Date of approval: 15 November 2012

Ethics committee: UC Davis Institutional Animal Care and Use committee

**Kingfisher International**

Project Identification Number: KFI-056-KF-3517, date of approval 22 Sep 2017 and KFI-056-EF-0118, date of approval 11 May 2018

Ethics committee: Kingfisher International Animal Care and Use Committee

**Dogs:**

The project identification code: 17765

Date of approval: 16 September 2013

Ethics committee: UC Davis Institutional Animal Care and Use committee
